# Early Signs of Cardiovascular Disease in Youth With Obesity and Type 2 Diabetes

NESLIHAN GUNGOR, MD<sup>1</sup>  
TRINA THOMPSON, RN, MPH, RVT<sup>2</sup>  
KIM SUTTON-TYRRELL, PHD<sup>2</sup>

JANINE JANOSKY, PHD<sup>3</sup>  
SILVA ARSLANIAN, MD<sup>1</sup>

**A**therosclerotic cardiovascular disease (CVD) is the major cause of mortality and morbidity in adults with type 2 diabetes (1). The origin of atherosclerosis is early in childhood with progression toward clinically significant lesions in young adulthood (2,3).

Carotid artery intima media thickness (IMT) and aortic pulse wave velocity (aPWV), a measure of arterial stiffness, are noninvasive measures of subclinical atherosclerosis that have been used as surrogate measures of cardiovascular events in various adult studies (4–9). Data regarding IMT and arterial stiffness in children are limited despite the increasing tide of obesity and type 2 diabetes. Therefore, in this pilot study, we aimed 1) to evaluate IMT and aPWV in obese adolescents with type 2 diabetes and 2) to investigate the relationship between these vascular markers and the clinical/metabolic risk factors of CVD.

## RESEARCH DESIGN AND METHODS

— We studied 20 adolescents with type 2 diabetes (undetectable islet-cell and GAD65 autoantibodies, duration  $1.7 \pm 0.4$  years) and 22 normal-weight and 20 obese healthy control subjects. The groups were comparable for age, sex, ethnicity, and puberty assessed

by Tanner criteria (10) (Table 1). Type 2 diabetic subjects were receiving either metformin or rosiglitazone (7), metformin with insulin (5), insulin alone (1), and metformin and acarbose (1) in addition to lifestyle modification. None of the subjects had a family history of hereditary hyperlipidemia. Four subjects were smokers (three normal weight and one obese) with no significant difference among the three groups for smoking status ( $P = 0.189$ ).

Each subject underwent a physical examination and had fasting blood drawn for glucose, insulin, C-peptide, adiponectin, lipid profile, high-sensitivity C-reactive protein (hs-CRP) and HbA<sub>1c</sub>. Homeostasis model assessment of insulin sensitivity (HOMA-IS) and fasting adiponectin level were used as surrogate estimates of insulin sensitivity (11–12). IMT and aPWV were measured by high resolution B-mode and Doppler ultrasonography, respectively (13). Four blood pressure measurements taken immediately before and after wave acquisition with an automatic cuff were averaged.

## Statistical analysis

Differences in continuous variables among the three groups were tested with

either ANOVA or the nonparametric equivalent, Kruskal-Wallis. Bivariate relationships were examined with Spearman's correlation analysis because IMT and aPWV were not normally distributed. Data are presented as means  $\pm$  SE. Statistical significance was set at  $P \leq 0.05$ . As hs-CRP results  $>8$  mg/l may indicate an acute inflammatory condition and cannot be used to establish risk of CVD, the values  $>8$  mg/l (data from four obese and two type 2 diabetic subjects) were excluded from statistical analysis (14). Data from type 2 diabetic patients taking insulin ( $n = 6$ ) were excluded from fasting insulin and HOMA-IS calculations. Multiple linear regression was used to evaluate predictors of aPWV, where variables were rank transformed with results presented after back transformation.

**RESULTS** — Clinical, biochemical, and ultrasonographic characteristics of the subjects are presented in Table 1. IMT was not different among the three groups. However, aPWV (centimeters per second) was highest in the type 2 diabetic subjects ( $769.4 \pm 81.7$ ), followed by the obese subjects ( $583.9 \pm 26.9$ ), and then followed by the normal-weight control subjects ( $496.9 \pm 15.2$ ) (Table 1). In the total group, after controlling for systolic blood pressure (because increased arterial stiffness is directly related to pulsatile blood pressure [15]), aPWV correlated significantly with BMI ( $r = 0.50$ ), fasting insulin ( $r = 0.46$ ), fasting glucose ( $r = 0.38$ ), HOMA-IS ( $r = -0.52$ ), HbA<sub>1c</sub> ( $r = 0.28$ ), triglycerides ( $r = 0.27$ ), and hs-CRP ( $r = 0.47$ ) ( $P < 0.001$ – $0.042$ ). A multiple regression analysis (obese and type 2 diabetic subjects) with aPWV as the dependent variable and HOMA-IS and HbA<sub>1c</sub> as the independent variables revealed total  $R^2 = 0.357$  ( $P = 0.002$ ), with the independent contribution of HOMA-IS ( $R^2 = 0.272$ ,  $P = 0.011$ ) and HbA<sub>1c</sub> ( $\Delta R^2 = 0.085$ ,  $P = 0.066$ ).

**CONCLUSIONS** — In the present study, aPWV was significantly higher in type 2 diabetic adolescents than obese and normal-weight control subjects with no differences in IMT among the three

From the <sup>1</sup>Division of Pediatric Endocrinology Metabolism and Diabetes Mellitus, Children's Hospital of Pittsburgh, University of Pittsburgh School of Medicine, Pittsburgh, Pennsylvania; the <sup>2</sup>Department of Epidemiology, Graduate School of Public Health, University of Pittsburgh, Pittsburgh, Pennsylvania; and the <sup>3</sup>Division of Biostatistics, Department of Family Medicine and Clinical Epidemiology, University of Pittsburgh, School of Medicine, Pittsburgh, Pennsylvania.

Address correspondence and reprint requests to Silva Arslanian, MD, Division of Endocrinology, Children's Hospital of Pittsburgh, 3705 Fifth Avenue at DeSoto Street, Pittsburgh, PA 15213. E-mail: silva.arslanian@chp.edu.

Received for publication 12 November 2004 and accepted in revised form 19 January 2005.

**Abbreviations:** aPWV, aortic pulse wave velocity; CVD, cardiovascular disease; hs-CRP, high-sensitivity C-reactive protein; IMT, intima media thickness; HOMA-IS, homeostasis model assessment of insulin sensitivity.

A table elsewhere in this issue shows conventional and Système International (SI) units and conversion factors for many substances.

© 2005 by the American Diabetes Association.

The costs of publication of this article were defrayed in part by the payment of page charges. This article must therefore be hereby marked "advertisement" in accordance with 18 U.S.C. Section 1734 solely to indicate this fact.

Table 1—Clinical and biochemical characteristics of study subjects

|                                   | Normal weight | Obese         | Type 2 diabetic | P      |
|-----------------------------------|---------------|---------------|-----------------|--------|
| Sex (male/female)                 | 10/12         | 11/9          | 7/13            |        |
| Race (African American/Caucasian) | 8/14          | 11/9          | 11/9            |        |
| Age (years)                       | 14.5 ± 0.5    | 14.6 ± 0.4    | 15.5 ± 0.4      | 0.307  |
| BMI (kg/m <sup>2</sup> )          | 20.2 ± 0.5*   | 35.1 ± 1.3    | 37.8 ± 1.5‡     | <0.001 |
| PWV (cm/s)                        | 496.9 ± 15.2* | 583.9 ± 26.9† | 769.4 ± 81.7‡   | <0.001 |
| IMT (mm)                          | 0.539 ± 0.008 | 0.543 ± 0.008 | 0.529 ± 0.008   | 0.446  |
| HbA <sub>1c</sub> (%)             | 5.1 ± 0.1     | 5.2 ± 0.1†    | 7.4 ± 0.5‡      | <0.001 |
| Systolic blood pressure (mmHg)    | 102.6 ± 3.3*  | 115.8 ± 4.1   | 123.9 ± 3.3‡    | <0.001 |
| Diastolic blood pressure (mmHg)   | 64.6 ± 6.1*   | 65.1 ± 1.7    | 70.3 ± 1.5‡     | <0.001 |
| HOMA-IS                           | 0.36 ± 0.03*  | 0.15 ± 0.02   | 0.09 ± 0.01‡    | <0.001 |
| Adiponectin (mg/ml)               | 12.7 ± 1.3*   | 6.7 ± 0.8     | 5.7 ± 0.9‡      | <0.001 |
| hs-CRP (mg/l)                     | 0.56 ± 0.12*  | 3.33 ± 0.77   | 3.38 ± 0.60‡    | 0.001  |
| Cholesterol (mg/dl)               | 147.6 ± 7.0*  | 173.2 ± 7.3   | 168.4 ± 6.7     | 0.038  |
| LDL (mg/dl)                       | 83.1 ± 6.7*   | 113.3 ± 7.3   | 95.0 ± 7.5      | 0.014  |
| Triglycerides (mg/dl)             | 80.4 ± 11.7   | 96.8 ± 8.9†   | 163.0 ± 18.6‡   | <0.001 |
| VLDL cholesterol (mg/dl)          | 15.6 ± 2.4*   | 22.7 ± 3.3    | 32.7 ± 3.7‡     | <0.001 |
| HDL cholesterol (mg/dl)           | 48.3 ± 2.1*   | 40.7 ± 2.2    | 41.2 ± 2.8‡     | 0.024  |

Data are means ± SE. Significant post-hoc comparisons with Bonferroni adjustment,  $P < 0.025$ . \*Normal weight vs. obese; †obese vs. type 2 diabetic; ‡type 2 diabetic vs. normal weight.

groups. The elevated aPWV in type 2 diabetic youth in our study (after adjusting for methodology) is comparable with values obtained from 41- to 59-year-old obese adults in a previous study (13) and ~40-year-old men in the Baltimore Longitudinal Study of Aging (6), suggestive of increased risk for premature aging of cardiovascular system in youth with type 2 diabetes. These findings may reflect early functional changes in the vasculature in the absence of ultrasonographically detectable structural changes. With increasing age and duration of diabetes, these functional changes may progress to structural changes if left without intervention. This proposal is consistent with a study in Japanese adults with type 2 diabetes, which identified age and diabetes duration as independent risk factors for increased aPWV and IMT (16).

A causative link between glycemia and vessel stiffness was suggested by the Pathobiological Determinants of Atherosclerosis in Youth Study (17). In adults with type 2 diabetes, for any given age and blood pressure value, aPWV increased with abnormal glucose tolerance and diabetes duration (18). Our finding of higher aPWV in type 2 diabetes versus equally obese youth of similar age and blood pressure is suggestive of the additional impact of hyperglycemia on vascular stiffness.

The higher aPWV (~87 cm/s) in obese adolescents compared with nor-

mal-weight control subjects ( $P = 0.006$ ) suggests that obesity alone is associated with abnormalities in aPWV. This is consistent with the data of 40- to 90-cm/s higher aPWV values in obese versus nonobese adults (13) and in obese French children with increased vessel stiffness measured by brachial artery reactivity (19).

Insulin resistance is the proposed link between obesity and vascular stiffness (20). Although both obese and type 2 diabetic adolescents are insulin resistant compared with normal-weight control subjects, HOMA-IS is 40% lower in type 2 diabetic compared with obese subjects. Hypoadiponectinemia may be another component of atherogenesis by reducing endothelial activation (21). Our findings of low adiponectin level in the obese and type 2 diabetic subjects with evidence of vascular stiffness are in accordance with these observations. Furthermore, the significantly elevated hs-CRP in obese and type 2 diabetic youth and the strong correlation between hs-CRP and aPWV are in accordance with the role of inflammation as a link between obesity/type 2 diabetes and vascular stiffness (22).

In conclusion, the present observation of a profound effect of obesity/type 2 diabetes on vascular compliance, i.e., increased vascular stiffness, renders further support to the American Heart Association guidelines of primary prevention of

atherosclerotic CVD beginning in childhood (23).

**Acknowledgements**—This work was supported by U.S. Public Health Service Grants RO1 HD27503 (to S.A.) and K24 HD01357 (to S.A.), The Pittsburgh Foundation Grant (to N.G.), Children's Hospital of Pittsburgh General Clinical Research Center (MO1-RR00084, to S.A. and N.G.), The University of Pittsburgh Obesity Nutrition Research Center (DK046204 from the National Institute of Diabetes and Digestive and Kidney Diseases, to N.G.), the Cochrane-Weber Endowed Fund (to N.G.), and the Renziehausen Trust Fund (to N.G.).

This work was presented in part at the American Diabetes Association 64th Scientific Sessions, 4–8 June 2004 in Orlando, Florida.

## References

- Meigs JB: Epidemiology of cardiovascular complications in type 2 diabetes mellitus. *Acta Diabetol* 40 (Suppl. 2):S358–S361, 2003
- Zieske AW, Malcom GT, Strong JP: Natural history and risk factors of atherosclerosis in children and youth: the PDAY study. *Pediatr Pathol Mol Med* 21:213–237, 2002
- Berenson GS: Childhood risk factors predict adult risk associated with subclinical cardiovascular disease: the Bogalusa Heart Study. *Am J Cardiol* 90 (10C):3L–7L, 2002
- Pignoli P, Tremoli E, Poli A, Oreste P, Pa-

- oletti R: Intimal plus medial thickness of the arterial wall: a direct measurement with ultrasound imaging. *Circulation* 74: 1399–1406, 1986
5. Salonen R, Salonen JT: Progression of carotid atherosclerosis and its determinants: a population-based ultrasonography study. *Atherosclerosis* 81:33–40, 1990
  6. Vaitkevicius PV, Fleg JL, Engel JH, O'Connor FC, Wright JG, Lakatta LE, Yin FC, Lakatta EG: Effects of age and aerobic capacity on arterial stiffness in healthy adults. *Circulation* 88:1456–1462, 1993
  7. Asmar R: Pulse wave velocity principles and measurement. In *Arterial Stiffness and Pulse Wave Velocity Clinical Applications*. O'Rourke MF, Safar M, Eds. Paris, Elsevier Science, 1999, p. 25–56
  8. Kuller L, Borhani N, Furberg C, Gardin J, Manolio T, O'Leary D, Psaty B, Robbins J: Prevalence of subclinical atherosclerosis and cardiovascular disease and association with risk factors in the Cardiovascular Health Study. *Am J Epidemiol* 139: 1164–1179, 1994
  9. Woodman RJ, Watts GF: Measurement and application of arterial stiffness in clinical research: focus on new methodologies and diabetes mellitus. *Med Sci Monit* 9: RA81–RA89, 2003
  10. Tanner JM: Growth and maturation during adolescence. *Nutr Rev* 39:43–55, 1981
  11. Gungor N, Saad R, Janosky J, Arslanian S: Validation of surrogate estimates of insulin sensitivity and insulin secretion in children and adolescents. *J Pediatr* 144: 47–55, 2004
  12. Bacha F, Saad R, Gungor N, Arslanian S: Adiponectin in youth: relationship to visceral adiposity, insulin sensitivity, and  $\beta$ -cell function. *Diabetes Care* 27:547–552, 2004
  13. Wildman RP, Mackey RH, Bostom A, Thompson T, Sutton-Tyrrell K: Measures of obesity are associated with vascular stiffness in young and older adults. *Hypertension* 42:468–473, 2003
  14. Pearson TA, Mensah GA, Alexander RW, Anderson JL, Cannon RO 3rd, Criqui M, Fadl YY, Fortmann SP, Hong Y, Myers GL, Rifai N, Smith SC Jr, Taubert K, Tracy RP, Vinicor F, Centers for Disease Control and Prevention, American Heart Association: Markers of inflammation and cardiovascular disease: application to clinical and public health practice: a statement for healthcare professionals from the Centers for Disease Control and Prevention and the American Heart Association. *Circulation* 107:499–511, 2003
  15. O'Rourke M: Arterial stiffness, systolic blood pressure, and logical treatment of arterial hypertension. *Hypertension* 15: 339–347, 1990
  16. Taniwaki H, Kawagishi T, Emoto M, Shoji T, Kanda H, Maekawa K, Nishizawa Y, Morii H: Correlation between the intima-media thickness of the carotid artery and aortic pulse-wave velocity in patients with type 2 diabetes: vessel wall properties in type 2 diabetes. *Diabetes Care* 22:1851–1857, 1999
  17. McGill HC Jr, McMahan CA, Malcom GT, Oalmann MC, Strong JP: Relation of glycohemoglobin and adiposity to atherosclerosis in youth: Pathobiological Determinants of Atherosclerosis in Youth (PDAY) research group. *Arterioscler Thromb Vasc Biol* 15:431–440, 1995
  18. Cruickshank K, Riste L, Anderson SG, Wright JS, Dunn G, Gosling RG: Aortic pulse-wave velocity and its relationship to mortality in diabetes and glucose intolerance: an integrated index of vascular function? *Circulation* 106:2085–2090, 2002
  19. Tounian P, Aggoun Y, Dubern B, Varille V, Guy-Grand B, Sidi D, Girardet JP, Bonnet D: Presence of increased stiffness of the common carotid artery and endothelial dysfunction in severely obese children: a prospective study. *Lancet* 27: 1400–1404, 2001
  20. Montagnani M, Quon MJ: Insulin action in vascular endothelium: potential mechanisms linking insulin resistance with hypertension. *Diabetes Obes Metab* 2:285–292, 2000
  21. Tan KCB, Xu A, Chow WS, Lam MCW, Ai VHG, Tam SCF, Lam KSL: Hypoadiponectinemia is associated with impaired endothelium-dependent vasodilation. *J Clin Endocrinol Metab* 89:765–769, 2004
  22. Gonzalez MA, Selwyn AP: Endothelial function, inflammation, and prognosis in cardiovascular disease. *Am J Med* 115: 99S–106S, 2003
  23. Kavey RE, Daniels SR, Lauer RM, Atkins DL, Hayman LL, Taubert K: American Heart Association: American Heart Association guidelines for primary prevention of atherosclerotic cardiovascular disease beginning in childhood. *J Pediatr* 142: 368–372, 2003
